# Supplementary material
Source: ML conference proceedings conference paper supplement (https://proceedings.mlr.press/v97/jitkrittum19a.html)
Supplement: Supplementary file 1 [file jitkrittum19a-supp.pdf]

# Kernel Mean Matching for Content Addressability of GANs

## Supplementary

Wittawat Jitkrittum\*  
Patsorn Sangkloy\*  
Muhammad Waleed Gondal  
Amit Raj  
James Hays  
Bernhard Schölkopf

Due to the file size limitation in the paper submission system, we were not able to upload our supplementary file which is too large due to the presence of multiple high-resolution images. The supplementary materials of our paper (accepted to ICML 2019) can be found at <https://github.com/wittawatj/cadgan>.

---

\*Equal contribution. Correspondence to: Wittawat Jitkrittum <[wittawat@tuebingen.mpg.de](mailto:wittawat@tuebingen.mpg.de)>, Patsorn Sangkloy <[patsorn.sangkloy@gmail.com](mailto:patsorn.sangkloy@gmail.com)>.
